# Supplementary material for: Improving the representation of anthropogenic CO 2 emissions in climate models: a new parameterization for the Community Earth System Model (CESM)
Source: Copernicus journal article supplement (doi:10.5194/esd-2018-12), 2018-03-19
Supplement: Supplementary file [file esd-2018-12-AC6-supplement.pdf]

There was an error in the reply to the following comment.

**Referee #3:**

- . d) *If so, I would suggest two possible modifications:*
  1. *Use some wording or structure as what I've described above*
  2. *Space-permitting, create either a small table or a flow diagram that shows these different levels of sophistication*

**Reply:** We have rewritten the two paragraphs to clarify the differences between RCPs and POPEM approaches. Thanks.

The amended paragraphs now read:

*One of the fields most in need of development is the inclusion in ~~global models~~ of co-evolutionary dynamical interactions of the socioeconomic dimension into global models with other Earth system components (Nobre et al., 2010; Robinson et al., 2017; Sarofim and Reilly, 2011). Human activity was a major driver of change in the Earth System in the recent past (Alter et al., 2017; Barnett et al., 2008; Crutzen, 2002), and it now dominates the natural system (Ruth, et al. 2011). However, most global models use basic socioeconomic assumptions about the behavior of societies and are only unidirectionally linked to the biogeophysical part of the Earth system (Müller-Hansen et al., 2017; Smith et al., 2014). The standard way of introducing anthropogenic climate change into ESMs is through Representative Concentration Pathways (RCPs). These are consistent sets of projections involving only radiative forcing components (van Vuuren et al., 2011), but which represent a step forward from the scenario approach of the last decade (Moss et al., 2010; van Vuuren et al., 2014; van Vuuren and Carter, 2014). However, RCPs are not fully-integrated socioeconomic parameterizations but rather estimates for describing plausible trajectories of human climate change drivers (Moss et al., 2010; Vuuren et al., 2012). They provide simplified accounts of human activities and processes from one-way coupled Integrated Assessment Models (IAMs, Müller-Hansen et al., 2017).*

*The use of RCPs is advantageous because they provide a set of pathways that serve to initialize climate models. However, two major problems remain within this approach. Firstly, human activities are not intrinsically embedded into the ESM, impeding sensitivity studies. Secondly, because of the weak coupling of IAMs, they cannot capture the sometimes counterintuitive bidirectional feedback and nonlinearity between the socioeconomic and natural subsystems (Motesharrei et al. 2016; Ruth et al. 2011). Good examples that illustrate the importance of including such bidirectional feedbacks feature in the HANDY model (Motesharrei et al. 2014) which has been used to analyze the key mechanisms behind societal collapses using the predator-prey model.*

*The RCP approach has been used in climate models because of its low computational cost. However, advances in computational resources now allow to parameterize human-Earth processes in a more detailed way, including the inclusion of population*

*dynamics into the modeling, as in the POPEM (POpulation P<sub>arameterization for E<sub>arth</sub> Models) module (Navarro et al., 2017).</sub>*
